# Supplementary material
Source: MDPI journal article supplement (https://www.mdpi.com/2079-6412/11/12/1532)
Supplement: s1 [file s1]

## A Supervised Machine-Learning Prediction of the Antimicrobial Capacity of Textiles Finished with Nanoparticles

Mahsa Mirzaei <sup>1</sup>, Irini Furxhi <sup>1,2,\*</sup>, Finbarr Murphy <sup>1,2</sup>, Martin Mullins <sup>1</sup>

<sup>1</sup> Department of Accounting and Finance, Kemmy Business School, University of Limerick, V94 PH93 Limerick, Ireland

<sup>2</sup> Transgero Ltd., Cullinagh, Newcastle West, V42 V384 Limerick, Ireland

\* Correspondence: irini.furxhi@transgero.eu or irini.furxhi@ul.ie; Tel.: +353-85-106-9771

Mahsa.Mirzaei@ul.ie; Tel.: +353-87-341-2425

finbarr.murphy@ul.ie; Tel.: +353-86-108-8137

martin.mullins@ul.ie; Tel.: +353-85-108-6426

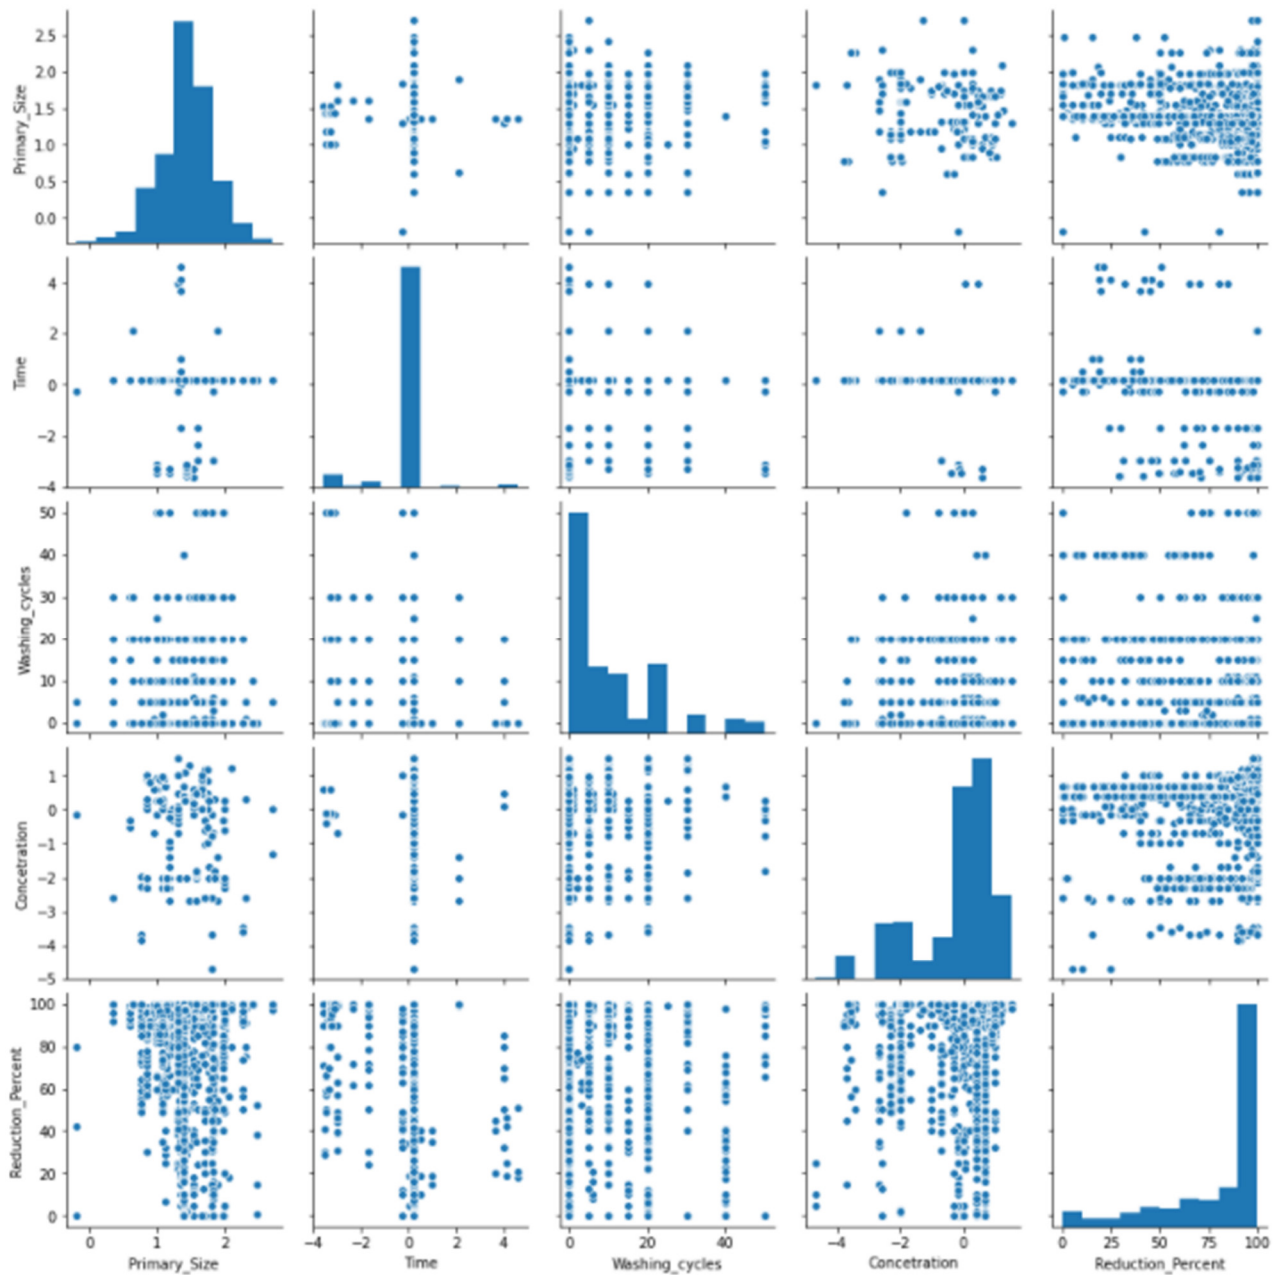

**Figure S1.** Seaborn pairplot correlation analysis of input variables with the outcome.
